# Supplementary material for: Day Napping and Short Night Sleeping Are Associated With Higher Risk of Diabetes in Older Adults
Source: PubMed Central journal article supplement — Diabetes Care. 2009 Oct 13;33(1):78–83. doi: 10.2337/dc09-1143 (PMC2797990; doi:10.2337/dc09-1143), 2009-10-13
Supplement: supp_dc09-1143_dc09-1143_Online_Appendix.pdf [file supp_dc09-1143_dc09-1143_Online_Appendix.pdf]

**Online Appendix Table —Subgroup analyses on hours of day napping and night sleeping in relation to diabetes after 2000\***

| Subgroup                 | Hours of daytime napping † |                  |                  | Hours of night sleeping |                  |       |                  |
|--------------------------|----------------------------|------------------|------------------|-------------------------|------------------|-------|------------------|
|                          | None                       | < 1              | ≥ 1              | < 5                     | 5-6              | 7-8   | ≥ 9              |
| <b>Age group</b>         |                            |                  |                  |                         |                  |       |                  |
| <b>&lt; 60 years</b>     |                            |                  |                  |                         |                  |       |                  |
| No. of cases             | 1 812                      | 1 212            | 318              | 146                     | 1 232            | 1 887 | 89               |
| OR (95% CI)              | 1.0                        | 1.11 (1.03-1.20) | 1.20 (1.05-1.37) | 1.29 (1.07-1.56)        | 1.02 (0.95-1.11) | 1.0   | 1.01 (0.80-1.26) |
| <b>60-64 years</b>       |                            |                  |                  |                         |                  |       |                  |
| No. of cases             | 1 287                      | 1 245            | 359              | 106                     | 975              | 1 709 | 109              |
| OR (95% CI)              | 1.0                        | 1.14 (1.05-1.24) | 1.59 (1.40-1.82) | 1.30 (1.05-1.61)        | 1.06 (0.98-1.15) | 1.0   | 1.21 (0.98-1.49) |
| <b>≥ 65 years</b>        |                            |                  |                  |                         |                  |       |                  |
| No. of cases             | 1 366                      | 2 006            | 495              | 138                     | 1 220            | 2 369 | 150              |
| OR (95% CI)              | 1.0                        | 1.22 (1.13-1.31) | 1.36 (1.22-1.52) | 1.41 (1.17-1.70)        | 1.08 (1.00-1.16) | 1.0   | 1.05 (0.88-1.25) |
| <b>Gender</b>            |                            |                  |                  |                         |                  |       |                  |
| <b>Men</b>               |                            |                  |                  |                         |                  |       |                  |
| No. of cases             | 2 515                      | 3 002            | 776              | 205                     | 2 081            | 3 802 | 225              |
| OR (95% CI)              | 1.0                        | 1.18 (1.12-1.25) | 1.35 (1.24-1.48) | 1.37 (1.18-1.60)        | 1.06 (1.00-1.13) | 1.0   | 1.16 (1.00-1.34) |
| <b>Women</b>             |                            |                  |                  |                         |                  |       |                  |
| No. of cases             | 1 950                      | 1 461            | 396              | 185                     | 1 346            | 2 163 | 123              |
| OR (95% CI)              | 1.0                        | 1.11 (1.04-1.20) | 1.40 (1.25-1.58) | 1.28 (1.08-1.51)        | 1.04 (0.97-1.12) | 1.0   | 0.97 (0.80-1.17) |
| <b>Education level</b>   |                            |                  |                  |                         |                  |       |                  |
| <b>Below high school</b> |                            |                  |                  |                         |                  |       |                  |
| No. of cases             | 966                        | 1 132            | 362              | 144                     | 915              | 1 324 | 88               |
| OR (95% CI)              | 1.0                        | 1.23 (1.12-1.35) | 1.55 (1.35-1.77) | 1.45 (1.19-1.75)        | 1.10 (1.01-1.21) | 1.0   | 1.11 (0.88-1.41) |

|                                |       |                  |                  |                  |                  |       |                  |
|--------------------------------|-------|------------------|------------------|------------------|------------------|-------|------------------|
| <b>High school or more</b>     |       |                  |                  |                  |                  |       |                  |
| No. of cases                   | 3 388 | 3 223            | 778              | 231              | 2 423            | 4 499 | 254              |
| OR (95% CI)                    | 1.0   | 1.15 (1.09-1.21) | 1.33 (1.22-1.45) | 1.30 (1.13-1.50) | 1.05 (1.00-1.11) | 1.0   | 1.08 (0.95-1.24) |
| <b>Health status</b>           |       |                  |                  |                  |                  |       |                  |
| <b>Excellent / very good</b>   |       |                  |                  |                  |                  |       |                  |
| No. of cases                   | 2 200 | 1 913            | 371              | 111              | 1 421            | 2 816 | 147              |
| OR (95% CI)                    | 1.0   | 1.16 (1.09-1.24) | 1.32 (1.17-1.49) | 1.33 (1.09-1.63) | 1.06 (0.99-1.13) | 1.0   | 1.12 (0.95-1.34) |
| <b>Good</b>                    |       |                  |                  |                  |                  |       |                  |
| No. of cases                   | 1 744 | 1 864            | 524              | 169              | 1 440            | 2 395 | 142              |
| OR (95% CI)                    | 1.0   | 1.16 (1.08-1.24) | 1.39 (1.25-1.55) | 1.47 (1.24-1.75) | 1.04 (0.97-1.12) | 1.0   | 1.16 (0.96-1.39) |
| <b>Fair or poor</b>            |       |                  |                  |                  |                  |       |                  |
| No. of cases                   | 466   | 622              | 261              | 106              | 522              | 669   | 55               |
| OR (95% CI)                    | 1.0   | 1.14 (1.00-1.30) | 1.35 (1.13-1.60) | 1.22 (0.97-1.54) | 1.12 (0.99-1.27) | 1.0   | 0.85 (0.63-1.14) |
| <b>BMI, (kg/m<sup>2</sup>)</b> |       |                  |                  |                  |                  |       |                  |
| <b>12.0-24.9</b>               |       |                  |                  |                  |                  |       |                  |
| No. of cases                   | 760   | 623              | 134              | 37               | 467              | 960   | 56               |
| OR (95% CI)                    | 1.0   | 1.10 (0.99-1.23) | 1.31 (1.08-1.59) | 1.06 (0.75-1.49) | 1.05 (0.93-1.17) | 1.0   | 1.11 (0.85-1.47) |
| <b>25.0-29.9</b>               |       |                  |                  |                  |                  |       |                  |
| No. of cases                   | 1 925 | 1 952            | 481              | 143              | 1 457            | 2 635 | 133              |
| OR (95% CI)                    | 1.0   | 1.19 (1.11-1.27) | 1.43 (1.29-1.60) | 1.41 (1.17-1.69) | 1.10 (1.03-1.17) | 1.0   | 0.99 (0.83-1.19) |
| <b>≥ 30.0</b>                  |       |                  |                  |                  |                  |       |                  |
| No. of cases                   | 1 688 | 1 778            | 523              | 183              | 1 423            | 2 248 | 152              |
| OR (95% CI)                    | 1.0   | 1.14 (1.06-1.23) | 1.31 (1.17-1.46) | 1.25 (1.05-1.48) | 1.02 (0.95-1.09) | 1.0   | 1.18 (0.99-1.42) |

| <b>Smoking</b>                    |       |                  |                  |                  |                  |       |                  |  |
|-----------------------------------|-------|------------------|------------------|------------------|------------------|-------|------------------|--|
| <b>Never</b>                      |       |                  |                  |                  |                  |       |                  |  |
| No. of cases                      | 1 611 | 1 536            | 337              | 162              | 1 196            | 2 008 | 124              |  |
| OR (95% CI)                       | 1.0   | 1.15 (1.07-1.24) | 1.35 (1.19-1.54) | 1.53 (1.28-1.82) | 1.10 (1.02-1.19) | 1.0   | 1.14 (0.94-1.39) |  |
| <b>Ever</b>                       |       |                  |                  |                  |                  |       |                  |  |
| No. of cases                      | 2 664 | 2 715            | 768              | 202              | 2 068            | 3 695 | 206              |  |
| OR (95% CI)                       | 1.0   | 1.17 (1.10-1.24) | 1.35 (1.23-1.47) | 1.19 (1.02-1.39) | 1.04 (0.98-1.10) | 1.0   | 1.05 (0.90-1.21) |  |
| <b>Family history of diabetes</b> |       |                  |                  |                  |                  |       |                  |  |
| <b>No</b>                         |       |                  |                  |                  |                  |       |                  |  |
| No. of cases                      | 2 687 | 2 670            | 669              | 225              | 2 031            | 3 579 | 209              |  |
| OR (95% CI)                       | 1.0   | 1.18 (1.11-1.25) | 1.34 (1.22-1.47) | 1.39 (1.20-1.61) | 1.09 (1.03-1.15) | 1.0   | 1.07 (0.92-1.24) |  |
| <b>Yes</b>                        |       |                  |                  |                  |                  |       |                  |  |
| No. of cases                      | 1 708 | 1 724            | 479              | 148              | 1 340            | 2 297 | 139              |  |
| OR (95% CI)                       | 1.0   | 1.13 (1.05-1.22) | 1.39 (1.24-1.56) | 1.18 (0.98-1.43) | 1.01 (0.94-1.09) | 1.0   | 1.14 (0.95-1.38) |  |

\* In general, the models were adjusted for age, gender, race, education, marital status, smoking status, coffee and alcohol consumptions, calorie intake, family history of diabetes, general health status, light physical activity level, moderate to vigorous physical activity level, and body mass index. Stratified variables were adjusted within subgroups when possible. Sample size may not add up to total because of missing values.

† Statistical significant for linear trend was tested for the day napping and diabetes relationship; all *P* for trend was < 0.0001 except for the following subgroups: < 60 years of age (*P* for trend = 0.002), fair or poor in health (*P* for trend = 0.0007), and BMI 12.0-24.9 (*P* for trend 0.004). No test for linear trend was conducted for hours of night sleeping as the relation was non-linear.
